# Supplementary figures and images for: Placental Alterations in a Chikungunya-Virus-Infected Pregnant Woman: A Case Report
Source: MDPI journal article supplement (doi:10.3390/microorganisms10050872), 2022-04-22

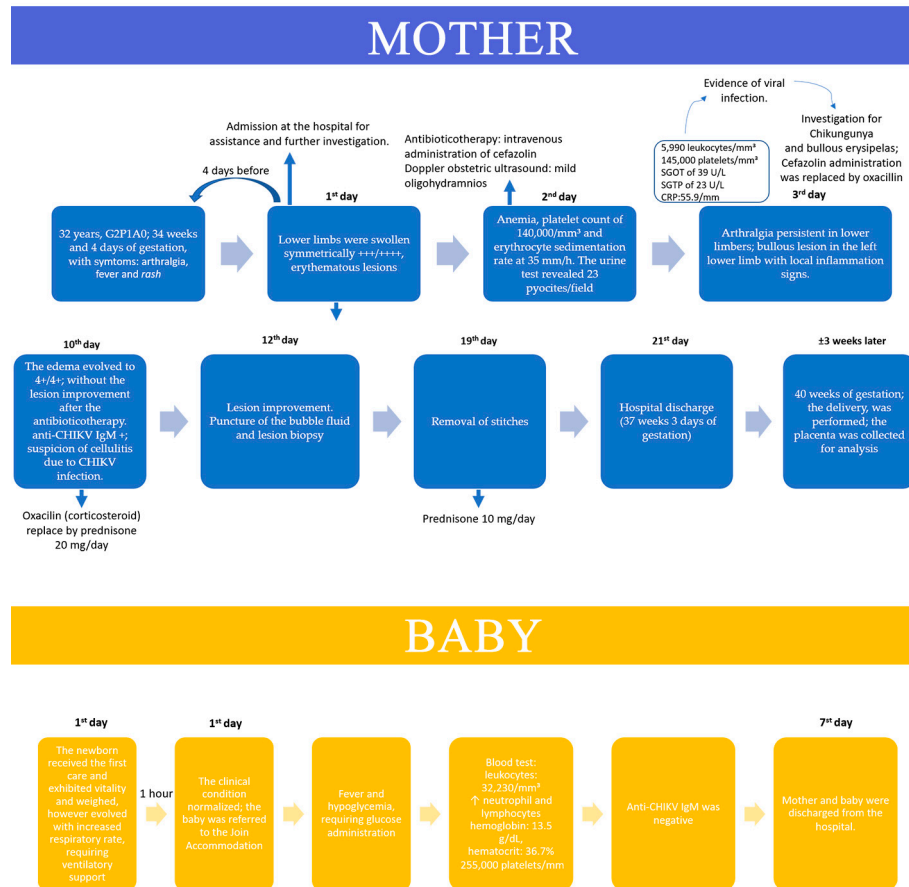

Figure S1. Clinical case description timeline—mother and baby.

Supplement: s1 [file s1]
